# Supplementary material for: Bacteria-derived fluorescent carbon dots for highly selective detection ofp-nitrophenol and bioimaging
Source: Royal Society of Chemistry journal article supplement (doi:10.1039/c9an01103j), 2019-01-01
Supplement: c9an01103j1.pdf [file c9an01103j1.pdf]

## Bacteria-derived fluorescent carbon dots for highly selective detection of *p*-nitrophenol and bio-imaging

Shengting Zhang,<sup>#a</sup> Dongfang Zhang,<sup>#b</sup> Yafang Ding,<sup>b</sup> Jianhao Hua,<sup>b</sup> Bing Tang,<sup>c</sup> Xiuling Ji,<sup>b</sup> Qi Zhang,<sup>b</sup> Yunlin Wei,<sup>b</sup> Kunhao Qin<sup>\*b,d</sup> and Bo Li<sup>\*e</sup>

<sup>a</sup> Faculty of Environmental Science and Engineering, Kunming University of Science and Technology, Kunming 650500, China.

<sup>b</sup> Faculty of Life Science and Technology, Kunming University of Science and Technology, Kunming 650500, China

<sup>c</sup> College of Life Sciences, Wuhan University, Wuhan, 430072

<sup>d</sup> Post-doctoral Research Station in Geological Resources and Geological Engineering, Faculty of Land Resource Engineering, Kunming University of Science and Technology, Kunming 650500, China.

<sup>e</sup> Faculty of Land Resource Engineering, Kunming University of Science and Technology, Kunming 650500, China.

#. These authors have contributed equally to this work.

\*. Corresponding author.

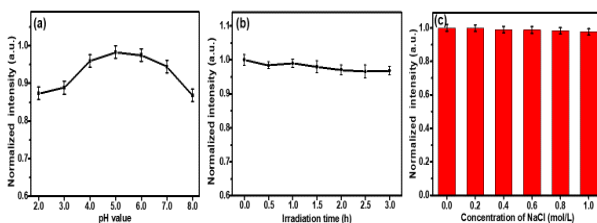

Fig. S1 (a) The fluorescence intensity of CDs-BC varying with the sample pH value from 2 to 8. (b) Normalized fluorescence intensity of CDs-BC under UV (365 nm) irradiation for 3 h. (c) Normalized fluorescence intensity of CDs-BC in different NaCl concentrations ranging from 0 to 1 M.

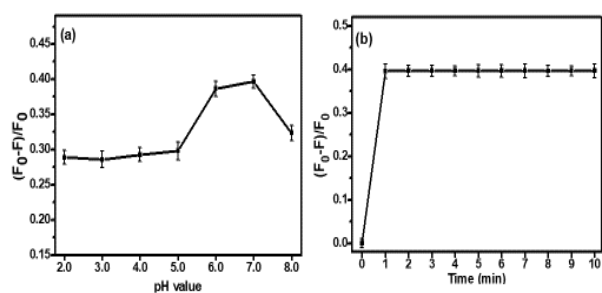

Fig. S2 Effect of (a) sample pH value and (b) reaction time on the detection of *p*-NP with CDs-BC.

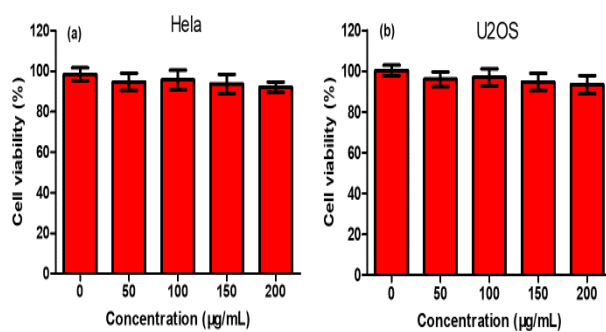

Fig. S3 HeLa (a) and U2OS (b) cell viability from MTT assays with different CDs-BC concentration after 24 h incubation.
